# Supplementary material for: Structural diversity and oligomerization of bacterial ubiquitin-like proteins
Source: PubMed Central journal article supplement — bioRxiv. 2024 Nov 25:2024.11.21.623966. Preprint. [Version 2] doi: 10.1101/2024.11.21.623966 (PMC11601603; doi:10.1101/2024.11.21.623966), 2024-11-25
Supplement: media-1.pdf [file media-1.pdf]

**Supplemental Information**

**Table S1. Ubiquitin-like protein architecture in Bil and Bub operons**

*See separate Excel workbook*

**Table S2. Proteins used in this study**

| Species                                        | Operon type | Ubl type                     | Accession                                                   | Sequence                                                                                                                                                                                                                                                                                                                                                                                                 |
|------------------------------------------------|-------------|------------------------------|-------------------------------------------------------------|----------------------------------------------------------------------------------------------------------------------------------------------------------------------------------------------------------------------------------------------------------------------------------------------------------------------------------------------------------------------------------------------------------|
| <i>Methylobacterium brachiatum</i> DSM19569    | Type II Bil | Ubl <sub>3</sub>             | IMG 2928979547                                              | MHEHEHVEDRVAVQVFDENLNKADVHLTDPVPTGRQIIKAA<br>GKHPVDDYAVLAWMPDNALRPLHLDETFDLRQHGVERILVA<br>PSDTLYRFFIDGQDQEWVVRGITGVVLKTLAGVDPAAFEVFL<br>VIPGDDDIRVEDHELFDLARKGVEHFQTVKRKAPAEHGIALK<br>VVVNGTETELKVHAGTPLRQVRTEALQKSGNVGRPEDEWQ<br>LKDEHGNPYDLNQTAVAGVGLHDGLVWLSLNAGVAGV                                                                                                                                  |
| <i>Citrobacter</i> sp. RHBSTW-00271            | Type I Bub  | Ubl <sub>3</sub>             | IMG 2938140956<br>(Ubl-E2 fusion; E2 fragment not included) | MQDIQSQHHRFIEVADETL SFRQVVMEDSTPNGSQISAA<br>SGFKPDQMPVVLMMLPNGSLEDIRPDEVV DLSSEVRRFIVVE<br>SDRTYFFITIDGARLEWPCR FITGYSIRQLGDIGDNKLLERE<br>DEADLEVQNDQIIDLDGDGIERFISRKATWKLNIQGKEFTFD<br>PTVVIRDAVIRAGLNPQAWHIFLKVVEGQPKVEKNIDVIDLR<br>TPGIEKRLRTPKDVNNGEPRATRRDFSLRPEDEHYLDEMG<br>YCWETRLVGNARWLIHDIYELPDGYNHHQVNLALLITSGYPV<br>NMLDMFYVYPPPLVRVNGVNIPATEATVAIDSVAYQRWSRHR<br>SWNPEIDSVISQLAMADGCLQKEVGG |
| <i>E. coli</i> ZDHYS365                        | Type II Bub | Ubl <sub>3</sub>             | NCBI WP_0530693 00.1                                        | MKNKFIKINDKIVEIDDLTPTGAQILLVAGVKDIVEYVLFQKLL<br>NGLLEEIRPEEKTTLDKEGVETFLMFNSDRTYRFTLNGKMF<br>WGAPSLTGATVKSLAECD FSDNDVWLEMKNEKDKLITDHEH<br>IDLTQPNVERLYTQETSINIIVNAKMRV VNRVISYWDVVHLA<br>YEHAENKETSISYVDYAKGPISNPEGSMVDGGYVQLTDGMI<br>FYVTQTDKS                                                                                                                                                         |
| <i>Bradyrhizobium</i> sp. Ghvi                 | Type I Bub  | Coiled-coil-Ubl <sub>1</sub> | IMG 2653856993                                              | MTEHDEAGAPTKREKELKAFRERQMRELREFEQRQKQELE<br>EFERQEELELKEFEERQHPYEIKIDRTEFKVTEHFLTGAQLR<br>ALPNPPIGPERDLFEVVP GGSDEKIADTQKV KMRDGLRFFTA<br>PAQINPGLL                                                                                                                                                                                                                                                      |
| <i>Bradyrhizobium nanningense</i> CCB AU 53390 | Type II Bil | Coiled-coil-Ubl <sub>1</sub> | IMG 2874628352                                              | MSAVHDNAGFGPERLANMSESGNKS AEQFDREAEFLKKEIE<br>GVNEVIRSEEKIKHDLEKREHELEEEARREREKHDHDDHDHG<br>HLVRITM VVNGQPVVIEAEEKEKLTEIRQKALQETQNLAQPA<br>ENWEIKDEAGAVLDPEKRVGEYHFGKEVTLFSLKAGVAG                                                                                                                                                                                                                       |
| <i>Pseudanabaena</i> sp. PCC 7367              | Type I Bub  | Ubl <sub>2</sub>             | IMG 2504678157<br>(Ubl-E2 fusion; E2 fragment not included) | MISTKKIQVQIDEKTYFVEDPVITGLQLLEKAEKRPSDEYLIFY<br>LLPGGQLEEIRLDETVDLRQMGIERFITWRSDRSFRLVIDGR<br>RFEWGIIITGIQLKLAGVDPKAYGIWLEVRGGEDRPIENAE<br>EVNLDAEGVERFFTGKKTTEGQNAILPSQDREY LKSRSLD<br>FEEIVDGSKCGVVPFGFPLPTQFDANQTDLLILPSGYDPAP<br>PDMFFLDPWIKLRQGNCFPKAANQPYAFDGRSWQRWSRH<br>NREWRPGVDGIWTKRVEHALEVA                                                                                                  |
| <i>Bradyrhizobium</i> sp. WSM1417              | Type II Bub | Ubl <sub>2</sub>             | IMG 2507506256                                              | MTDAKHEVRIHIDQKPYHSPNPTTGADLYELGHVAEGKVLV<br>KEVEGDHEDKLV RIDSPSIHLTEDEHFHSGDAPEKHYTIIVNT<br>DPVVVDHDLVTFEELVKIAYVPPTGLDPEFTVSFEHAKSVP<br>HHGDLPPNGKVTVKKHGTIFD VDVHTNRS                                                                                                                                                                                                                                 |
| <i>Photobacterium chitinilyticum</i> BEI 247   | Type II Bub | DUF1508-Ubl <sub>1</sub>     | IMG 2885240117                                              | MKGKFEIFQSSKNNEYFRLKAAGNWEIILDSEGYTTKSSCL<br>NGIESVKENAQLEERFERLVAKNGEHYFNLKAGNGQVIGTS<br>EMYTRRQGMENGIH SVMKNAPDADIKDLTIDEPEHDKEFNII<br>VNGRPKTVTSKILTFEDIVKLAFSTIADGNSTIYTMQYKKNQG<br>NKPEGLTVDGDIKIKSGVIFNVTATDKS                                                                                                                                                                                     |
| <i>Marinifilum flexuosum</i> isolate 1468      | Type II Bub | DUF1508-Ubl <sub>1</sub>     | NCBI WP_2820164 92.1                                        | MNSYFTIKVGKDDQYYFNLKAGNHEIILQSEGYENKSGTLNG<br>IESVRLNSQIRSNFEIRYSKRNEPYFVL<br>KAPNGKIIGCSEMYSSVHAMENGIH SVMKNGNTPKIHDLTDD<br>DHEGKERQIVVNGRVKTVWNQKYIEFKEL<br>VELAFGSYNDNPNTCYTITYTRGCSNKPQGSIVKGEEVKVK<br>PKMIFNVTATDKS                                                                                                                                                                                 |

**Table S3. Crystallographic data collection and refinement**

|                                    | <i>E. coli</i> Ubl <sub>3</sub> | <i>M. brachiatum</i> Ubl <sub>3</sub>                 |
|------------------------------------|---------------------------------|-------------------------------------------------------|
| <b>Data collection</b>             |                                 |                                                       |
| Data collection date               | August 30, 2022                 | March 2, 2023                                         |
| Beamline                           | ALS 5.0.1                       | APS 24ID-C                                            |
| Wavelength (Å)                     | 0.97741                         | 0.97911                                               |
| Space group                        | P3 <sub>2</sub> 21              | P3 <sub>1</sub> 21                                    |
| Cell dimensions                    |                                 |                                                       |
| <i>a</i> , <i>b</i> , <i>c</i> (Å) | 117.54, 117.54, 104.44          | 136.02, 136.02, 105.51                                |
| α, β, γ (°)                        | 90, 90, 120                     | 90, 90, 120                                           |
| Resolution (Å)*                    | 46.5-1.87 (1.91-1.87)           | 117.8-3.04 (3.22-3.04)                                |
| <i>R</i> <sub>merge</sub>          | 0.093 (2.232)                   | 0.204 (3.416)                                         |
| <i>I</i> / σ <i>I</i>              | 16.1 (0.8)                      | 14.0 (0.9)                                            |
| Completeness (%)                   | 100 (100)                       | 99.9 (99.9)                                           |
| Redundancy                         | 9.5 (6.1)                       | 10.0 (10.4)                                           |
|                                    |                                 |                                                       |
| <b>Refinement</b>                  |                                 |                                                       |
| Resolution (Å)                     | 46.46-1.87                      | 117.80-3.04                                           |
| No. reflections                    | 69064                           | 22023                                                 |
| <i>R</i> <sub>work</sub> (%)       | 18.16 (33.16)                   | 23.86 (39.41)                                         |
| <i>R</i> <sub>free</sub> (%)       | 21.27 (35.77)                   | 27.62 (39.99)                                         |
| No. atoms                          |                                 |                                                       |
| Protein (non-H)                    | 3526                            | 4779                                                  |
| Ligand/ion (non-H)                 | 28                              | 31 (Ca <sup>2+</sup> , PO <sub>4</sub> <sup>-</sup> ) |
| Water                              | 537                             | 53                                                    |
| Hydrogen                           | 3511                            | 0                                                     |
| <i>B</i> -factors                  |                                 |                                                       |
| Protein                            | 41.7                            | 114.5                                                 |
| Ligand/ion                         | 53.7                            | 139.9                                                 |
| Water                              | 45.5                            | 98.5                                                  |
| R.m.s. deviations                  |                                 |                                                       |
| Bond lengths (Å)                   | 0.017                           | 0.003                                                 |
| Bond angles (°)                    | 1.399                           | 0.57                                                  |
| Validation                         |                                 |                                                       |
| MolProbity score                   | 1.07                            | 1.11                                                  |
| Clashscore                         | 2.12                            | 3.22                                                  |
| Poor rotamers (%)                  | 1.30                            | 0.40                                                  |
| Ramachandran plot                  |                                 |                                                       |
| Favored (%)                        | 98.77                           | 99.49                                                 |
| Allowed (%)                        | 1.23                            | 0.51                                                  |
| Disallowed (%)                     | 0                               | 0                                                     |
| PDB ID                             | 9CD2                            | 8U38                                                  |
| SBGrid Data Bank ID                | 1115                            | 1043                                                  |

\*Values in parentheses are for highest-resolution shell.

**Table S4. CryoEM data collection and refinement**

|                                                     | <i>Citrobacter</i> Ubl <sub>3</sub><br>(global) | <i>Citrobacter</i> Ubl <sub>3</sub><br>(local) | <i>M. brachiatum</i> Ubl <sub>3</sub> |
|-----------------------------------------------------|-------------------------------------------------|------------------------------------------------|---------------------------------------|
| <b>Data collection and processing</b>               |                                                 |                                                |                                       |
| Magnification                                       | 130,000                                         |                                                | 105,000                               |
| Voltage (kV)                                        | 300                                             |                                                | 300                                   |
| Electron exposure (e <sup>-</sup> /Å <sup>2</sup> ) | 45                                              |                                                | 50                                    |
| Defocus range (μm)                                  | -2.0 to -1.2                                    |                                                | -2.0 to -1.2                          |
| Pixel size (Å)                                      | 0.935                                           |                                                | 0.822                                 |
| Symmetry imposed                                    | Helical and D1                                  |                                                | Helical and D1                        |
| Initial particle images                             | 1,634,973                                       |                                                | 495,217                               |
| Final particle images                               | 1,258,222 (D1 symmetry expanded)                | 148,697                                        | 151,090                               |
| Map resolution (Å; 0.143 FSC)                       | 2.43                                            | 2.73                                           | 3.08                                  |
|                                                     |                                                 |                                                |                                       |
| <b>Refinement</b>                                   | <i>Global (4 protomers)</i>                     | <i>Local (1 protomer)</i>                      | <i>Global (4 protomers)</i>           |
| Model resolution (Å; 0.143 FSC)                     | 2.4                                             | 2.7                                            | 3.1                                   |
| Model composition                                   |                                                 |                                                |                                       |
| Non-hydrogen atoms                                  | 4698                                            | 1704                                           | 4650                                  |
| Protein residues                                    | 584                                             | 212                                            | 584                                   |
| Ligands (Ca <sup>2+</sup> )                         | 14                                              | 5                                              | 10                                    |
| <i>B</i> factors (Å <sup>2</sup> )                  |                                                 |                                                |                                       |
| Protein                                             | 85.1                                            | 124.9                                          | 125.7                                 |
| Ligand                                              | 108.1                                           | 110.0                                          | 90.2                                  |
| R.m.s. deviations                                   |                                                 |                                                |                                       |
| Bond lengths (Å)                                    | 0.002                                           | 0.004                                          | 0.002                                 |
| Bond angles (°)                                     | 0.384                                           | 0.431                                          | 0.471                                 |
| Validation                                          |                                                 |                                                |                                       |
| MolProbity score                                    | 1.15                                            | 1.32                                           | 1.72                                  |
| Clashscore                                          | 3.56                                            | 5.59                                           | 6.09                                  |
| Poor rotamers (%)                                   | 0.76                                            | 1.05                                           | 3.23                                  |
| Ramachandran plot                                   |                                                 |                                                |                                       |
| Favored (%)                                         | 98.61                                           | 99.05                                          | 99.31                                 |
| Allowed (%)                                         | 1.39                                            | 0.95                                           | 0.69                                  |
| Disallowed (%)                                      | 0                                               | 0                                              | 0                                     |
| PDB ID                                              | 9D59                                            | 9D5A                                           | 9D5B                                  |
| EMDB ID                                             | EMD-46576                                       | EMD-46577                                      | EMD-46578                             |

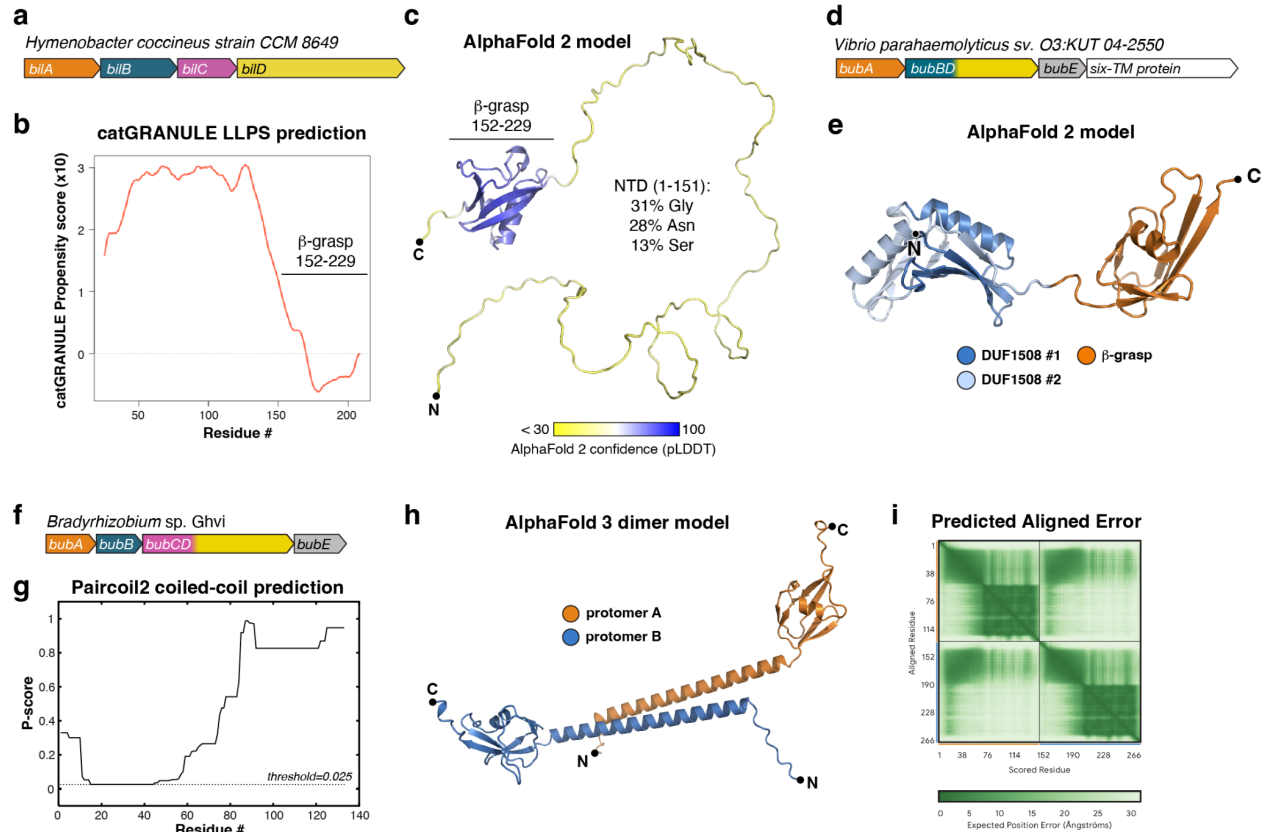

**Figure S1. Bacterial ubiquitin-like proteins show diverse architectures.** (a) Operon schematic of a *Hymenobacter* Type II Bil operon whose BilA protein (IMG Gene ID 2625034186) N-terminal domain is predicted to be disordered. (b) catGRANULE analysis of *Hymenobacter* BilA showing that its disordered N-terminal domain has a high propensity to undergo liquid-liquid phase separation. (c) AlphaFold 2 model of *Hymenobacter* BilA colored by confidence (pLDDT). The sequence composition of the disordered N-terminal domain is noted. (d) Operon schematic of a *Vibrio* Type II Bub operon whose BubA protein (IMG ID 2704903835) N-terminal domain is predicted to encode tandem DUF1508 domains. (e) AlphaFold2 model of *Vibrio* BubA, with DUF1508 domains colored dark/light blue and β-grasp domain dark orange. See [Figure S2c-d](#) for SEC-MALS analysis of two DUF1508-Ubl1 proteins. (f) Operon schematic of a *Bradyrhizobium* Type I Bub operon whose BubA protein (IMG ID 2653856993) N-terminal domain is predicted to form a coiled-coil. (g) PairCoil2 analysis of *Bradyrhizobium* BubA, showing a predicted coiled-coil domain at the N-terminus. (h) AlphaFold 3 model of a *Bradyrhizobium* BubA dimer, with one protomer colored dark orange and the second protomer colored dark blue. See [Figure S2e](#) for SEC-MALS analysis of this protein, and [Figure S2f](#) for SEC-MALS analysis of a second predicted CC-Ubl<sub>1</sub> protein. (i) AlphaFold 3 predicted aligned error plot for the *Bradyrhizobium* BubA dimer shown in panel (H), showing high confidence for interactions between dimer-related coiled-coil N-terminal domains.

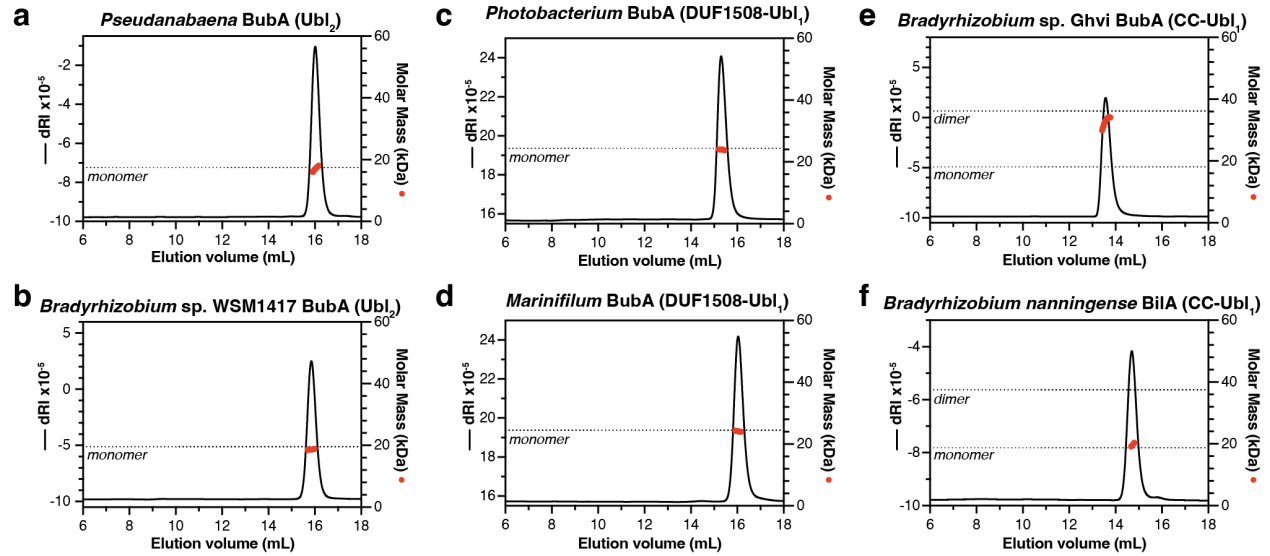

**Figure S2. SEC-MALS analysis of bacterial Ubl proteins.** (a) SEC-MALS analysis of *Pseudanabaena* sp. PCC 7367 BubA (see [Table S2](#) for accession numbers and protein sequences), which possesses two  $\beta$ -grasp domains. Differential refractive index (dRI; measuring protein concentration) is shown as a black line, and measured molar mass is shown as red circles. The predicted molar mass of a monomer is shown as a dotted line. (b) SEC-MALS analysis of *Bradyrhizobium* sp. WSM1417 BubA, which possesses two  $\beta$ -grasp domains. The predicted molar mass of a monomer is shown as a dotted line. (c) SEC-MALS analysis of *Photobacterium chitinilyticum* BEI 247 BubA, which possesses a single  $\beta$ -grasp domain and a predicted DUF1508 N-terminal domain. The predicted molar mass of a monomer is shown as a dotted line. (d) SEC-MALS analysis of *Marinifilum flexuosum* isolate 1468 BubA, which possesses a single  $\beta$ -grasp domain and a predicted DUF1508 N-terminal domain. The predicted molar mass of a monomer is shown as a dotted line. (e) SEC-MALS analysis of *Bradyrhizobium* sp. Ghvi BubA, which possesses a single  $\beta$ -grasp domain and a predicted coiled-coil N-terminal region. The predicted molar mass of a monomer and a dimer are shown as dotted lines. (f) SEC-MALS analysis of *Bradyrhizobium nanningense* CCBAU 53390 BilA, which possesses a single  $\beta$ -grasp domain and a predicted coiled-coil N-terminal region. The predicted molar mass of a monomer and a dimer are shown as dotted lines.

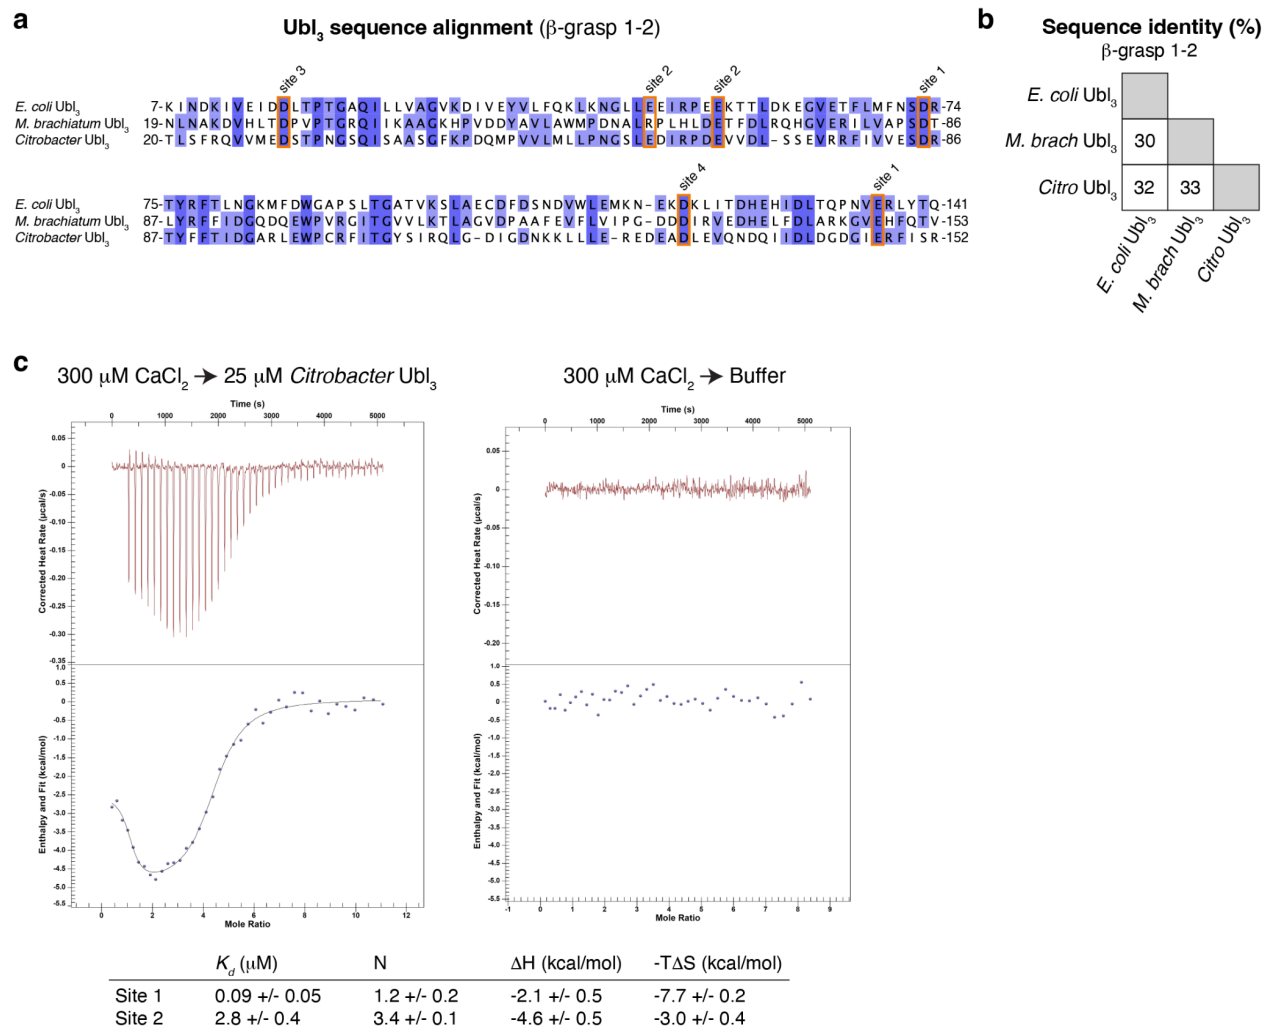

**Figure S3. Sequence alignments and Ca<sup>2+</sup> binding of Ubl<sub>3</sub> proteins.** (a) Sequence alignment of β-grasp domains 1 and 2 from the three Ubl<sub>3</sub> proteins under study (see [Table S2](#)), with residues involved in Ca<sup>2+</sup> ion coordination outlined in orange. (b) Table of protein sequence identities for the three Ubl<sub>3</sub> proteins in panel (a). (c) Isothermal titration calorimetry for *Citrobacter* Ubl<sub>3</sub> binding CaCl<sub>2</sub>. *Left*: Binding data (top) and fit curve (bottom); trace is representative of four independent trials. *Right*: No-protein control injection series. Bottom: Data from four independent trials was fit using a two-site binding model. N designates molar equivalent of ligand binding.

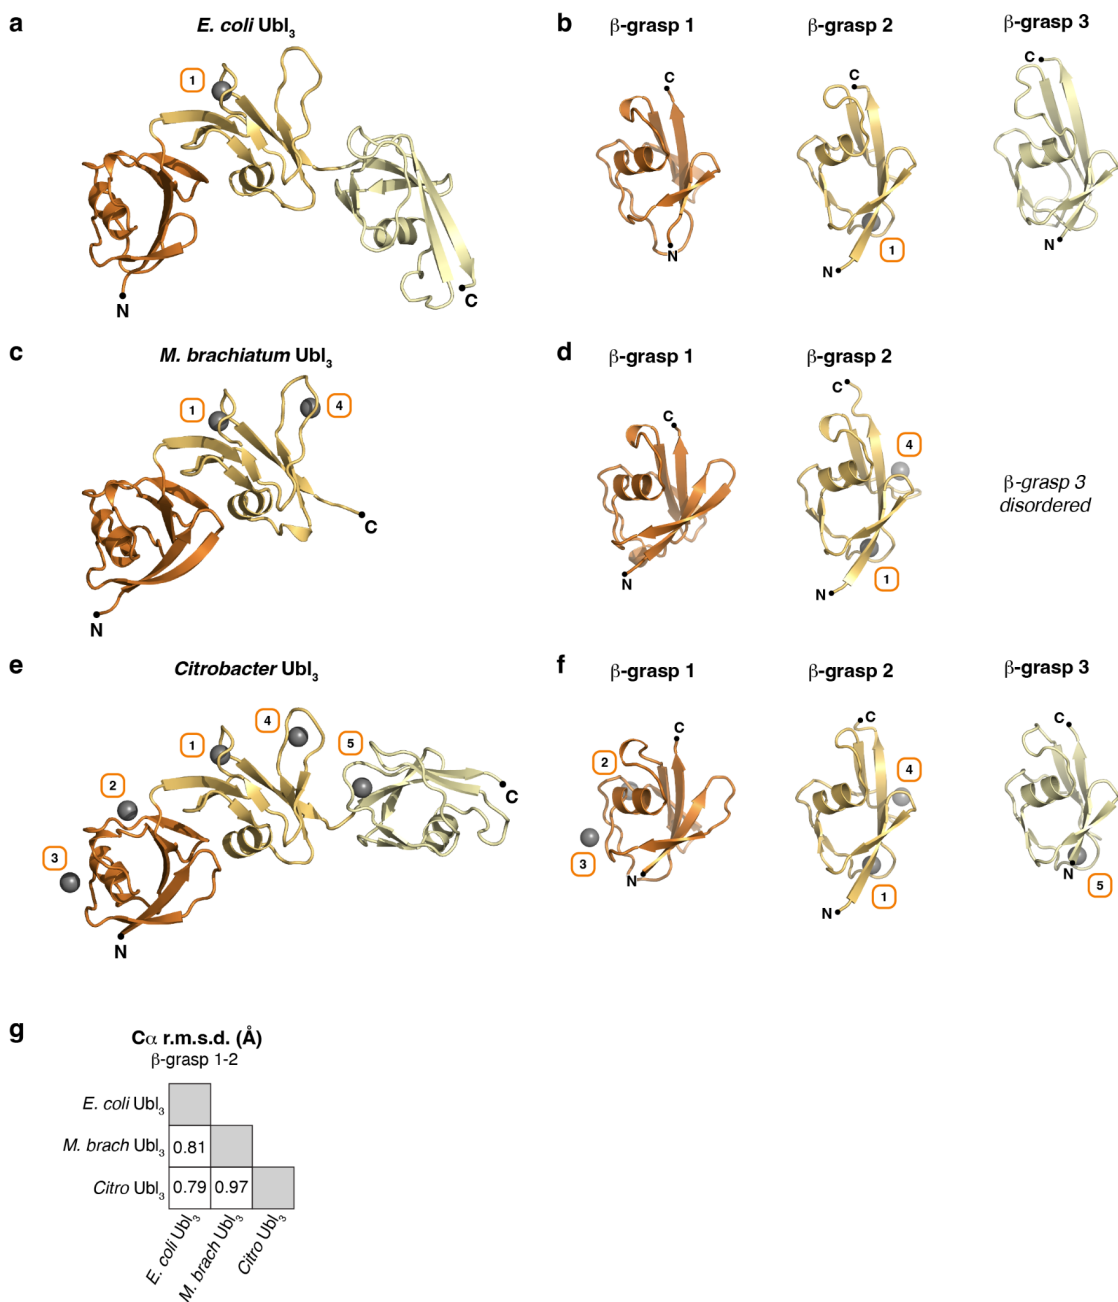

**Figure S4. Structures of Ubl<sub>3</sub> proteins.** (a) Structure of an *E. coli* Ubl<sub>3</sub> monomer, with  $\beta$ -grasp domains 1-3 colored dark orange, light orange, and light yellow, respectively. Bound Ca<sup>2+</sup> ions are shown as gray spheres and labeled with the site number (according to *Citrobacter* Ubl<sub>3</sub> Ca<sup>2+</sup> site numbering). (b) Structures of *E. coli* Ubl<sub>3</sub>  $\beta$ -grasp domains 1-3. (c) Structure of an *M. brachiatum* Ubl<sub>3</sub> monomer.  $\beta$ -grasp domain 3 is disordered and not shown. (d) Structures of *M. brachiatum* Ubl<sub>3</sub>  $\beta$ -grasp domains 1-2. (e) Structure of a *Citrobacter* Ubl<sub>3</sub> monomer. (f) Structures of *Citrobacter* Ubl<sub>3</sub>  $\beta$ -grasp domains 1-3. (g) Table of structural similarity between three Ubl<sub>3</sub> proteins, spanning  $\beta$ -grasp domains 1 and 2. Ca r.m.s.d.: average root mean squared displacement between aligned alpha-carbon atoms. Comparison of *E. coli* and *Citrobacter* Ubl<sub>3</sub>  $\beta$ -grasp domain 3 shows higher divergence, with a 3.1 Å overall Ca r.m.s.d. in this domain.



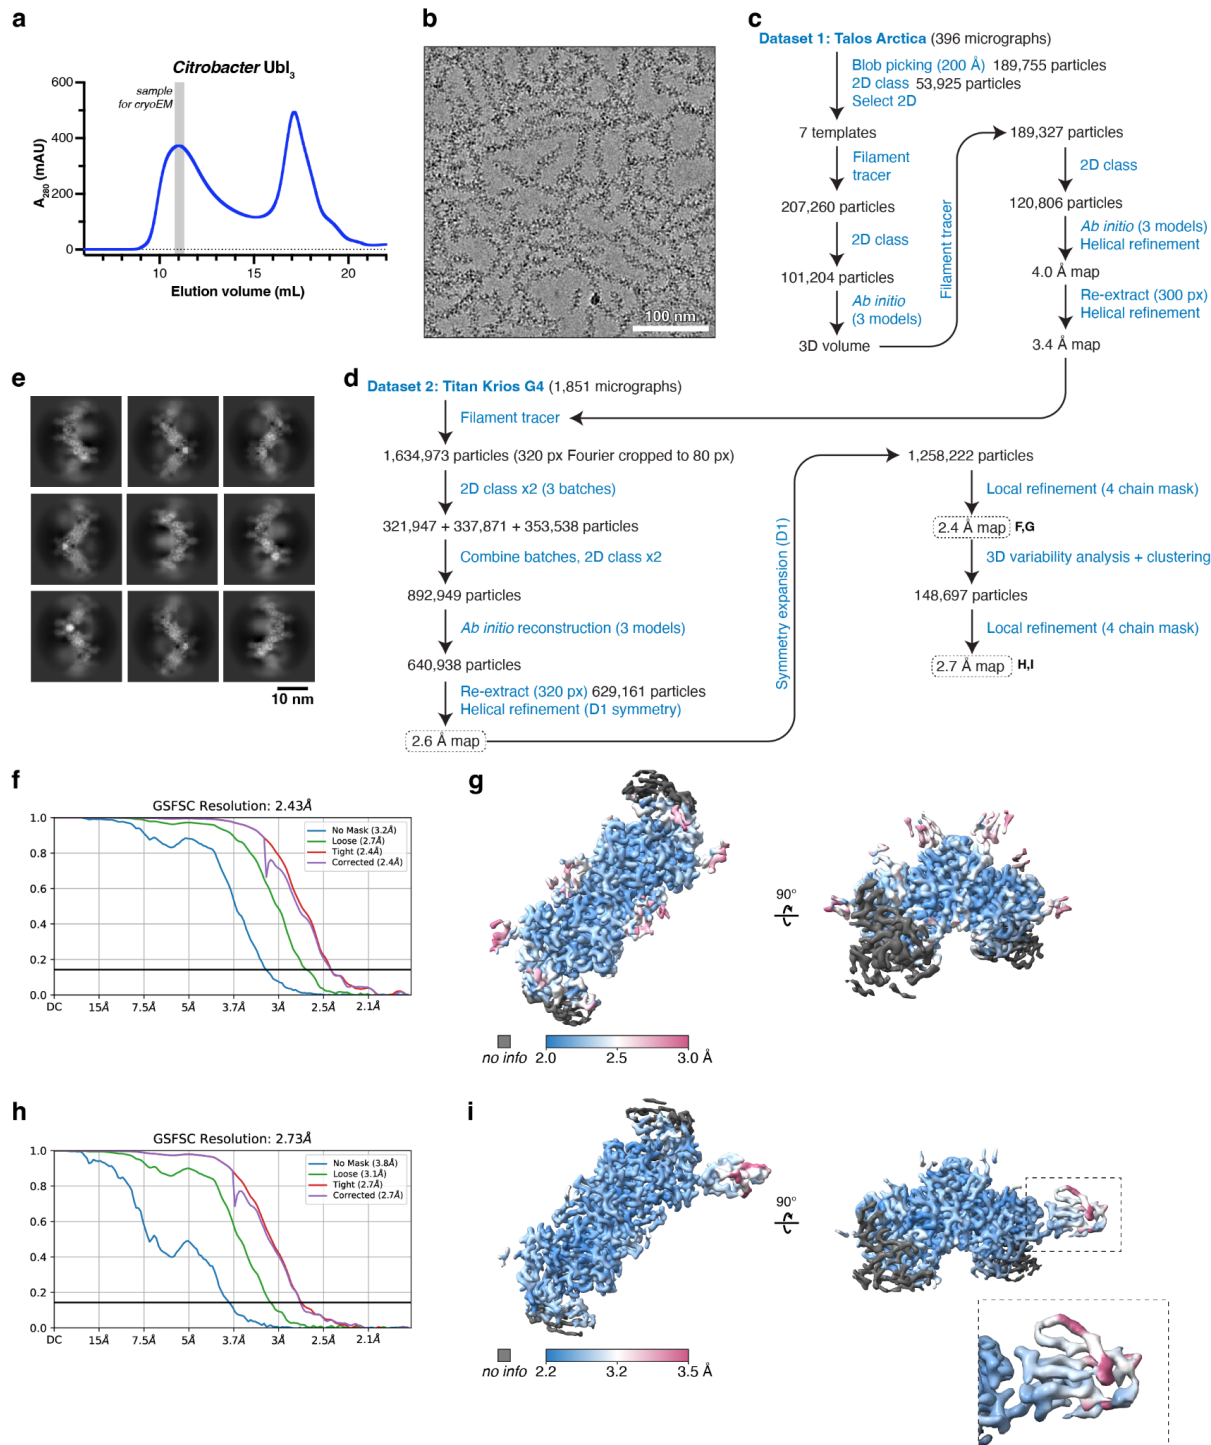

**Figure S5. CryoEM structure of a *Citrobacter Ubl*<sub>3</sub> filament.** (a) Size exclusion chromatography elution profile of purified *Citrobacter Ubl*<sub>3</sub>, with the fraction used for cryoEM analysis highlighted in gray. (b) Raw cryoEM micrograph of *Citrobacter Ubl*<sub>3</sub>. (c) CryoEM structure determination workflow for preliminary dataset. (d) CryoEM structure determination workflow for final dataset. (e) Selected 2D classes from final dataset. (f) Fourier Shell Correlation graph for global refinement (four *Ubl*<sub>3</sub> protomers masked). (g) Local resolution of

final globally refined cryoEM map (four Ubl<sub>3</sub> protomers masked). **(h)** Fourier Shell Correlation graph for local refinement with particle subset selected from 3D variability analysis to reveal  $\beta$ -grasp domain 3 in one protomer (four Ubl<sub>3</sub> protomers masked). **(i)** Local resolution of local refinement with particle subset selected from 3D variability analysis to reveal  $\beta$ -grasp domain 3 in one protomer (four Ubl<sub>3</sub> protomers masked).

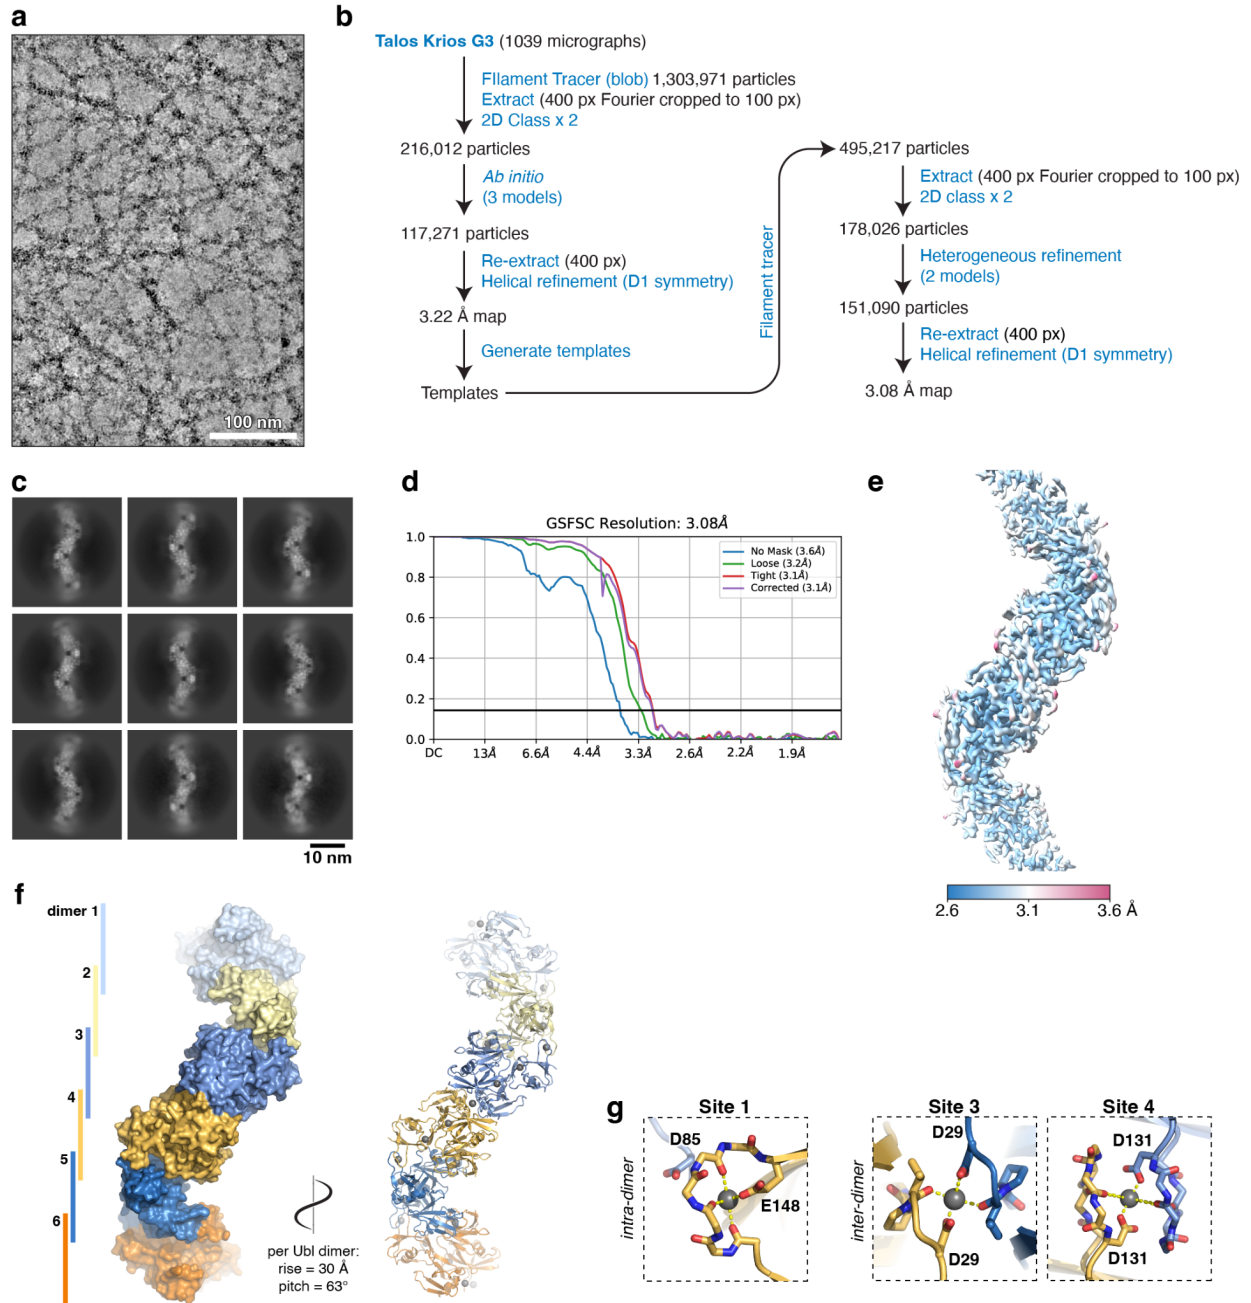

**Figure S6. CryoEM structure of an *M. brachiatum* Ubl<sub>3</sub> filament. (a)** Raw cryoEM micrograph of *M. brachiatum* Ubl<sub>3</sub> after incubation with 5 mM CaCl<sub>2</sub>. **(b)** CryoEM structure determination workflow. **(c)** Selected 2D classes. **(d)** Fourier Shell Correlation graph for final refinement. **(e)** Local resolution of final refined cryoEM map. **(f)** Architecture of the *M. brachiatum* Ubl<sub>3</sub> filament, showing six Ubl<sub>3</sub> dimers in alternating blue and orange. Bound Ca<sup>2+</sup> ions are shown in gray on the cartoon diagram at right. **(g)** Closeup views of Ca<sup>2+</sup> ions bound at sites 1 (intra-dimer), 3 (inter-dimer), and 4 (inter-dimer).
